# 1 **3D printed biomimetic cochleae and machine learning co-modelling** 2 **provides clinical informatics for cochlear implant patients**

3 Iek Man Lei<sup>1,2</sup>, Chen Jiang<sup>3,1,4</sup>, Chon Lok Lei<sup>5,6</sup>, Simone Rosalie de Rijk<sup>3</sup>, Yu Chuen Tam<sup>7</sup>, Chloe  
4 Swords<sup>8</sup>, Michael P.F. Sutcliffe<sup>1</sup>, George G. Malliaras<sup>1</sup>, Manohar Bance<sup>3,\*</sup>, Yan Yan Shery Huang<sup>1,2,\*</sup>

5 <sup>1</sup>*Department of Engineering, University of Cambridge, United Kingdom*

6 <sup>2</sup>*The Nanoscience Centre, University of Cambridge, United Kingdom*

7 <sup>3</sup>*Department of Clinical Neurosciences, University of Cambridge, United Kingdom*

8 <sup>4</sup>*Department of Electronic Engineering, Tsinghua University, Beijing 100084, China*

9 <sup>5</sup>*Institute of Translational Medicine, Faculty of Health Sciences, University of Macau, Macau*

10 <sup>6</sup>*Department of Computer Science, University of Oxford, United Kingdom*

11 <sup>7</sup>*Emmeline Centre for Hearing Implants, Addenbrookes Hospital, Cambridge, United Kingdom*

12 <sup>8</sup>*Department of Physiology, Development and Neurosciences, Cambridge, United Kingdom*

13

14 \* Corresponding authors: [yysh2@cam.ac.uk](mailto:yysh2@cam.ac.uk) and [mlb59@cam.ac.uk](mailto:mlb59@cam.ac.uk). These authors jointly supervised  
15 this work.

## 16 **Abstract**

17 Cochlear implants (CIs) restore hearing in patients with severe to profound deafness by  
18 delivering electrical stimuli inside the cochlea. Understanding CI stimulus spread, and how it  
19 correlates to patient-dependent factors, is hampered by the poor accessibility of the inner ear  
20 and by the lack of suitable *in vitro*, *in vivo* or *in silico* models. Here, we present 3D printing-  
21 neural network co-modelling for interpreting clinical electric field imaging (EFI) profiles of  
22 CI patients. With tuneable electro-anatomy, the 3D printed cochleae were shown to replicate  
23 clinical scenarios of EFI profiles at the off-stimuli positions. The co-modelling framework

**NOTE: This preprint reports new research that has not been certified by peer review and should not be used to guide clinical practice.**

24 demonstrated autonomous and robust predictions of patient EFI or cochlear geometry,  
25 unfolded the electro-anatomical factors causing CI stimulus spread, assisted on-demand  
26 printing for CI testing, and inferred patients' *in vivo* cochlear tissue resistivity (estimated  
27 mean = 6.6 kΩcm) by CI telemetry. We anticipate our framework will facilitate physical  
28 modelling and digital twin innovations for electrical prostheses in healthcare.

29

## 30 **Introduction**

31 The use of neuromodulation implants and bioelectronic devices has been increasing rapidly,  
32 and is anticipated to form a new era of medicine<sup>1,2</sup>. By delivering local electrical stimuli to  
33 tissues, these electronic implants restore lost neural functions in tissues or nerves, or  
34 modulate signalling patterns for therapeutic outcomes<sup>2,3</sup>. Cochlear implants (CIs) are by far  
35 the most widely used neuromodulation electronic implants, with well over 500,000 CIs  
36 having been implanted worldwide<sup>4</sup>, and their prevalence is only expected to grow more  
37 rapidly with the projected increase in the elderly population<sup>1,4</sup>. Bypassing the malfunctioning  
38 peripheral auditory mechanisms by direct neural stimulation, the CI electrode array is  
39 designed to restore sound perception. It also attempts, in broad terms, to reproduce the  
40 tonotopic architecture of the cochlea by delivering frequency specific programmed  
41 stimulation at localised regions of the cochlear lumen; this in turn stimulates separate  
42 auditory neural elements<sup>5,6</sup> (Fig.1a), with lower sound frequencies represented apically and  
43 higher frequencies basally.

44

45 **Fig.1: 3PNN co-modelling approach with embedded 3D printing of biomimetic cochleae**  
 46 **for reproducing the CI stimulus spread characteristics.**

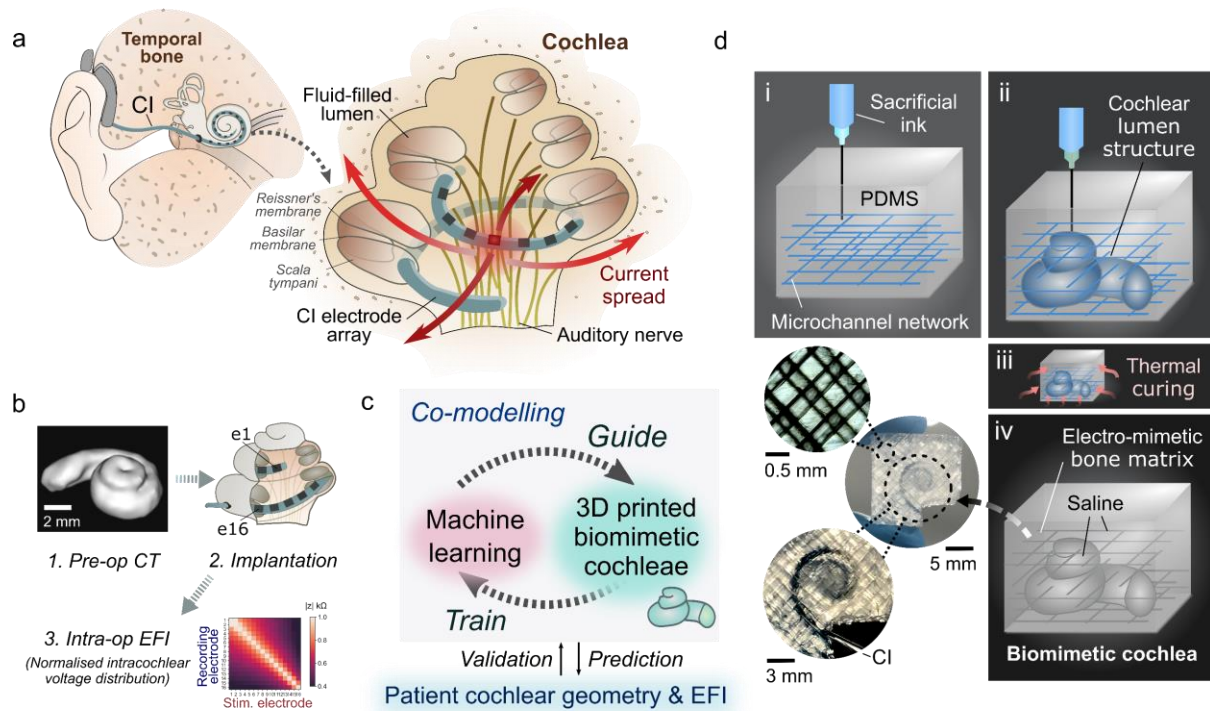

47

48 **a**, Schematic of the auditory system and the cochlea with a CI implanted. The ‘current  
 49 spread’ problem induced by a stimulated electrode of the CI electrode array is indicated. **b**,  
 50 Schematic of the routine CI assessment process; **1**. Pre-operative CT scan of a patient’s  
 51 cochlea, which typically only has sufficient resolution to reveal the ensemble spiral-shaped  
 52 cavity of a cochlea; **2**. Implantation of the electrode array of a CI in the scala tympani of the  
 53 cochlea; **3**. Acquisition of an intra-operative EFI (electric field imaging) profile from a  
 54 patient, which is derived from recording the induced intracochlear voltage  $V$  measured at  
 55 each electrode upon injecting consecutive current pulses at each electrode in the array. The  
 56 voltage measurements are then converted to transimpedance magnitude  $|z|$  by normalising the  
 57 voltage  $V$  with the stimulation current impulse  $I_{stim}$  ( $|z| = V / I_{stim}$ ). The off-stimulation (off-  
 58 diagonal) measurements in the EFI present information about the tissue impedance<sup>7</sup>. **c**,  
 59 Overview of the 3PNN co-modelling framework for providing clinical informatics. **d**,  
 60 Schematic of the embedded 3D printing strategy to produce the electro-mimetic bone  
 61 matrices and the biomimetic cochleae.

62

63 A major limitation of today’s neural prostheses is their imprecise control of the administered  
 64 stimulus, arising from the intrinsic conductive nature of biological tissues<sup>8,9</sup>, and particularly  
 65 of the biological fluids in the inner ear<sup>5,7</sup>. This limitation is well exemplified by the ‘current  
 66 spread’ problem of CIs, where the uncontrolled spread of electrical stimulus leads to off-

67 target excitation of the neighbouring auditory nerve fibres (thus causing a mismatch or  
68 ‘smeared’ representation in the perceived sound from that intended)<sup>7</sup> (Fig.1a). Cochlear  
69 anatomy, tissue conductivity, and implant positioning are suggested to be the primary patient-  
70 specific factors controlling the intracochlear voltage distribution induced by CIs<sup>7,10-12</sup>. In  
71 particular, cochlear anatomy (in terms of size and shape) is variable<sup>13</sup>, with different levels of  
72 volumetric conductance of cochlear fluids affecting the intracochlear voltage induced by  
73 stimulation. Moreover, pathophysiological conditions could affect electrical conductivity of  
74 the cochlear bony walls, and thus CI induced electric fields<sup>14</sup>. As the cochlea is embedded  
75 deep inside the temporal bone and has a complex anatomy, its electrical characteristics are  
76 difficult to quantify in a living subject. As a result, a model that deciphers how different  
77 characteristics of a patient’s cochlea affect the stimulus spread would be a valuable tool for  
78 predicting and optimizing the stimulus signals, and provide insights into factors controlling  
79 the large variation in patient-specific CI performance and sound perception.

80

81 Although various physical and computational models have been developed for CI  
82 testing<sup>7,12,15-17</sup>, they are insufficient to evaluate the stimulus spread in human cochleae.  
83 Animal models are well-established for *in vivo* CI testing, but due to the drastic differences  
84 between the cochlear anatomies of humans and animals<sup>18</sup>, incomplete insights into human  
85 responses are obtained<sup>1,3</sup>. Though human cadavers can provide anatomical fidelity, they are  
86 limited in supply and have altered electrical properties due to preservation and post-mortem  
87 changes<sup>19</sup>. *In silico* approaches, such as finite element modelling (FEM), can overcome  
88 ethical, sample availability and cost issues<sup>20</sup>. However, existing FEM modelling is limited by  
89 several factors, including scant knowledge of the electrical properties of live human cochlear  
90 tissues to fit different *in vivo* cases<sup>21</sup>, the inability to capture patient-dependent anatomically-

91 guided CI positioning, and the underdetermined boundary conditions and physical/empirical  
92 law descriptions<sup>15</sup> (discussed in Supplementary Fig.1a).

93

94 To establish a robust modelling framework for interpreting clinical CI testing data, here we  
95 created a library of 3D printed cochlear models ( $n = 82$ ). These biomimetic cochleae capture  
96 the diverse geometries that human cochlear lumens can take, along with a spectrum of bone  
97 tissue resistivities, using ranges reported in *in vivo* human studies. Supplementary Video 1  
98 shows CT scans of exemplar 3D printed biomimetic cochleae. Using these models, a broad  
99 spectrum of clinically representative electric field imaging (EFI) profiles (normalised  
100 intracochlear voltage distribution along the CI electrode array) was acquired by varying the  
101 model electro-anatomical characteristics. Then, by inputting EFI profiles acquired from the  
102 biomimetic cochleae as the training dataset, we establish a neural network machine learning  
103 model termed 3PNN (3D printing and neural network co-modelling, overview shown in  
104 Fig.1c), which provides powerful clinical informatics such as deciphering patient-specific  
105 attributes of CI current spread, and inferring patient-dependent cochlear tissue resistivity.

106

## 107 **Results**

### 108 **Designable electro-mimetic bone matrices**

109 The human cochlea is a spiral-shaped hollow organ embedded in the temporal bone (Fig.1a).  
110 Since there were no established reports of *in vivo* cochlear tissue conductivities, our first goal  
111 was to establish a printable material system that could emulate the range of reported bone  
112 tissue conductivities (hereafter, termed electro-mimetic bone matrix). *In vivo* human studies  
113 estimated that the electrical resistivities of human skulls vary widely between 0.6 to 26.6  
114 k $\Omega$ cm, depending on the site, composition, age and porosity<sup>22–26</sup> (Supplementary Fig.2).

115 To reproduce the mesoscale electrical properties of bone, we take inspiration from the micro-  
116 architecture of bones, which consists of conductive fluid-filled interconnected pores  
117 surrounded by a poorly conductive mineralised phase<sup>27</sup>. Thus, we structured an electro-  
118 mimetic bone matrix that exhibits interconnected saline-filled channels inside a crosslinked  
119 PDMS (polydimethylsiloxane) elastomer. The interconnected channels were created by  
120 embedded printing a Pluronic F127 sacrificial ink in pre-crosslinked PDMS (Fig.1d,  
121 Supplementary Video 2), permitting flexible and precise tuning of the void density and,  
122 therefore, the resistivity of the electro-mimetic bone matrices (Supplementary Fig.3e).  
123 Comparing our printing method with stereolithography, Pluronic F127 can be easily removed  
124 after printing<sup>28</sup> and further enhances the wettability of PDMS due to its amphiphilic nature.  
125 The channels were then filled with a physiological saline, which we hypothesise is important  
126 to emulate the electrical impedance properties of bone tissues, as pores in bone are normally  
127 wet with extracellular fluids. The electrochemical impedance spectroscopy (EIS)  
128 measurements in Fig.2a and Supplementary Fig.4 show that an electro-mimetic bone matrix  
129 can be designed to exhibit impedance properties matching those of a cadaveric cochlear bone  
130 in a human head for the entire frequency range ( $f = 10 \text{ Hz} - 100 \text{ kHz}$ ) studied in EIS. In  
131 particular, the Fourier fundamental frequency associated with the EFI stimulation pulse,  
132 (estimated to be  $f \sim 14 \text{ kHz}$  to  $\sim 20 \text{ kHz}$  depending on CI type), lies in the frequency-  
133 independent impedance magnitude plateau region. By varying the void fraction in the electro-  
134 mimetic bone matrix from 20% to 84%, the resistivity of the matrix that is derived from the  
135 impedance magnitude plateau, can be tuned from 0.2 to 23.4  $\text{k}\Omega\text{cm}$  (Fig.2b), covering almost  
136 the entire reported resistivity range of live human skull tissues<sup>22-26</sup> (0.6 – 26.6  $\text{k}\Omega\text{cm}$ , Fig.2c).  
137



138 **Fig.2: Electrical properties of electro-mimetic bone matrices.**

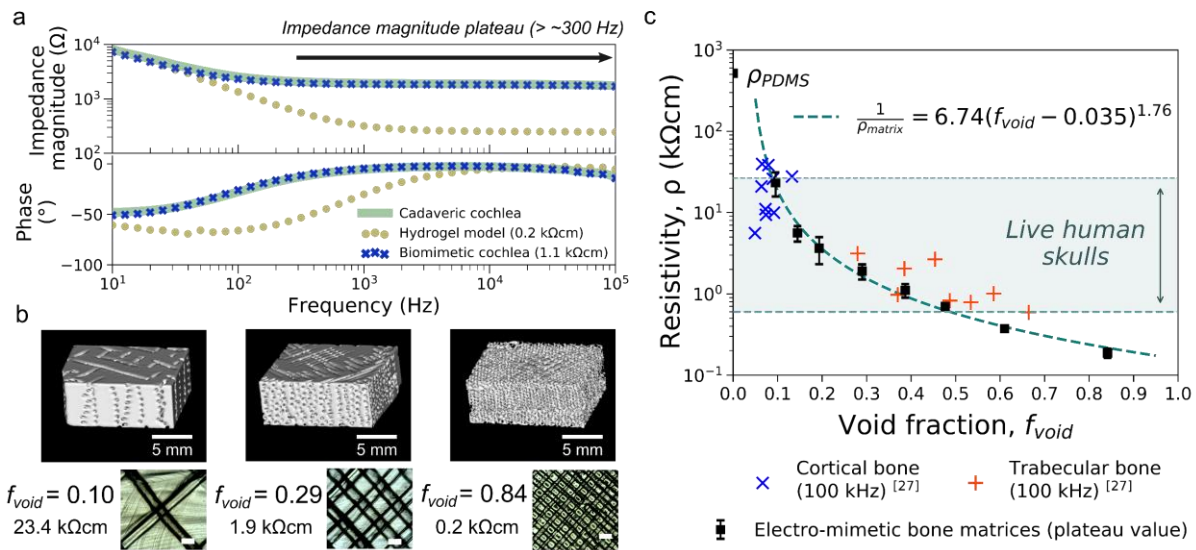

139  
 140 **a**, Bode plot showing the impedance properties of a cadaveric cochlea in a human head, and  
 141 3D printed cochlear models made of an electro-mimetic bone matrix and a hydrogel. The  
 142 frequency range associated with the impedance magnitude plateau is indicated. **b**,  $\mu$ -CT  
 143 reconstructed images (top) and optical microscopic images (bottom) of the electro-mimetic  
 144 bone matrices at different volumetric void fractions ( $f_{void}$ ). Scale bar of the optical  
 145 microscopic images = 500  $\mu$ m. The resistivities of the matrices were determined from their  
 146 plateau impedance magnitude and the size of samples.  $n = 3$  independent samples. **c**,  
 147 Resistivity of the electro-mimetic bone matrices (plateau value,  $n = 3$  independent samples)  
 148 as a function of  $f_{void}$ , compared to the reported resistivities of bovine cortical and trabecular  
 149 bones<sup>27</sup>. The relationship between the resistivity of the electro-mimetic bone matrix and  $f_{void}$   
 150 is well-described by a percolation equation of a conductor-insulator composite<sup>29</sup>  
 151 (Supplementary Fig.3e). Data are presented as mean values  $\pm$  SD.  
 152

153 Fig.3 shows a material property chart summarising the electrical resistivity and the Young's  
 154 modulus for a range of biological tissues and polymeric materials. The 3D printed electro-  
 155 mimetic bone matrices cover a wide resistivity range, which cannot be imitated by a single  
 156 printable material (i.e. thermoplastics or hydrogels) alone or a hydrogel-fillers matrix (i.e.  
 157 bioceramics and PDMS microbeads dispersed in hydrogels) (Supplementary Fig.5a). Apart  
 158 from electrical resistivity, we suggest that Young's modulus of the model is also an important  
 159 consideration for electronic implant testing. Adopting PDMS as the solid phase of the  
 160 electro-mimetic bone matrix not only facilitates the ease of embedded printing, but also  
 161 imparts favourable mechanical properties as a CI testing platform. With a Young's modulus

162 in the  $10^6$  Pa range, we estimate that the force associated with CI electrode insertion will not  
 163 induce a significant deformation to the matrix (Supplementary Note 1). At the same time, the  
 164 compliance of the matrix mitigates mechanical damage to the fine electrodes of a CI, which  
 165 is commonly experienced when inserting CI electrode arrays repeatedly in cadaveric samples  
 166 (modulus of hard tissues  $> 10^9$  Pa). Hence, multiple insertions can take place for the same CI  
 167 electrode array, which is of practical importance due to the time-consuming fabrication and  
 168 costs associated with a fully functioning CI. Overall, the above results suggest the electro-  
 169 mimetic bone matrices to be a suitable material system for creating electroanatomical models  
 170 of human cochleae.

171 **Fig.3: Wide resistivity tuneability and adequate mechanical properties of electro-**  
 172 **mimetic bone matrices.**

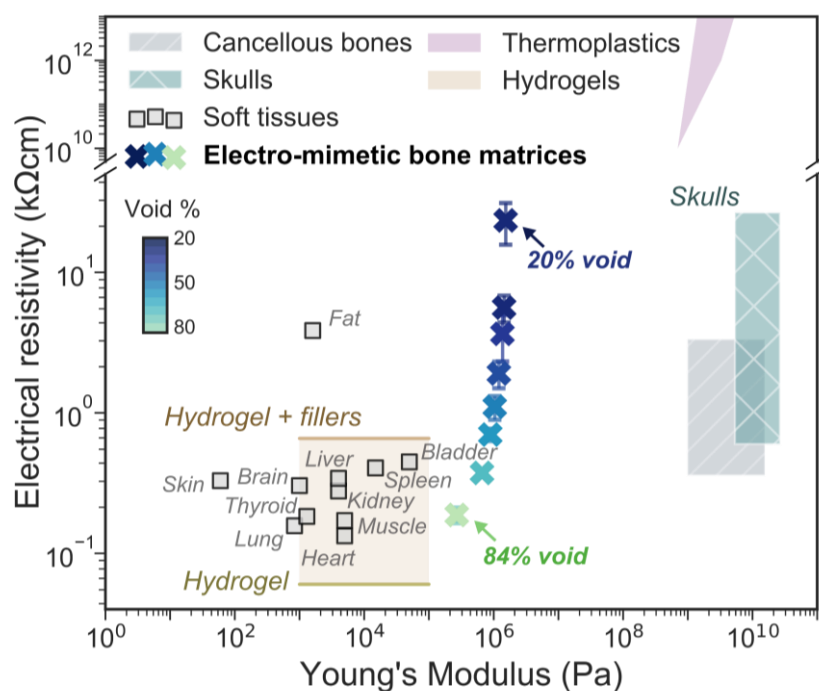

173 A map of resistivity versus Young's modulus of human tissues, thermoplastics, the hydrogel-  
 174 fillers matrices, and the electro-mimetic bone matrices (plateau values) tested in this study ( $n$   
 175 = 3 independent samples). The compositions of the hydrogel and hydrogel-fillers matrices  
 176 tested here are listed in Supplementary Fig.5a. Young's modulus of the electro-mimetic bone  
 177 matrix was estimated by scaling the Young's modulus of pure PDMS (1.7 MPa at a curing  
 178 temperature of  $60^\circ\text{C}$ <sup>30</sup>) linearly with the  $f_{void}$  of the matrix. Tissues and thermoplastics data,  
 179 and the Young's modulus of hydrogels were compiled from literature<sup>22-27,31-35</sup>. Data of the  
 180 electro-mimetic bone matrices are presented as mean values  $\pm$  SD.  
 181



### 182 **3D printed biomimetic cochleae**

183 Clinically, a CI electrode array is inserted into the scala tympani, one of the three cochlear  
184 ducts<sup>14</sup> (Fig.1a). As a coarse-grained approach to replicate the electroanatomical features of a  
185 CI implanted cochlea, we approximate the cochlea as one ensemble spiral cavity with  
186 continuously narrowing diameter, and omit the inner soft-tissue membranous structures  
187 inside the cochlea, such as the basilar membrane and Reissner's membrane. This is because,  
188 firstly, in a typical patient's pre-operative CT scan as routine clinical assessment (Fig.1b), the  
189 scan resolution only permits the identification of the shape of the ensemble cochlear lumen  
190 and not the fine microanatomical soft tissue structures (Supplementary Fig.6); and secondly,  
191 our preliminary finite element modelling shows that the effect of the basilar membrane and  
192 the Reissner's membrane inside a cochlea on the off-stimulation EFI profile is likely to be  
193 insignificant, as the boundary impedances are dominated by surrounding bone tissues (see  
194 Supplementary Fig.1b). Therefore, we constructed the biomimetic cochleae by embedded 3D  
195 printing a tapered and spiral-shaped cochlear lumen cavity inside an electro-mimetic bone  
196 matrix (Fig.1d and Supplementary Video 2). The spiral-shaped cavity was filled with a  
197 physiological saline to mimic the ionic conduction milieu in the cochlea (perilymph)  
198 (Supplementary Fig.3c) and the conduction properties at the electrode-electrolyte interface.  
199  
200 Since the size and the shape of a cochlea is unique to each individual and can vary greatly  
201 from person-to-person<sup>13,36,37</sup>, we assign four geometrical descriptors to parametrically  
202 describe the reported anatomical variations in CI implanted human cochleae; they are basal  
203 lumen diameter, taper ratio, cochlear width and cochlear height (see definitions in Fig.4a and  
204 Supplementary Table 1). For electroanatomical modelling of cochleae, we incorporated a  
205 fifth descriptor, the matrix resistivity, which is controlled by the void fraction of the electro-  
206 mimetic bone matrix. In total, 82 biomimetic cochleae were printed at different combinations

207 of model descriptors. With this physical model library, we artificially reconstructed a broad  
 208 spectrum of the electroanatomical features of human cochleae with even feature distributions.

209

210 **Fig.4: 3D printed biomimetic cochleae replicate the broad anatomical spectrum of**  
 211 **human cochleae, enable geometrically-guided CI positioning, and give patient-relevant**  
 212 **EFI profiles.**

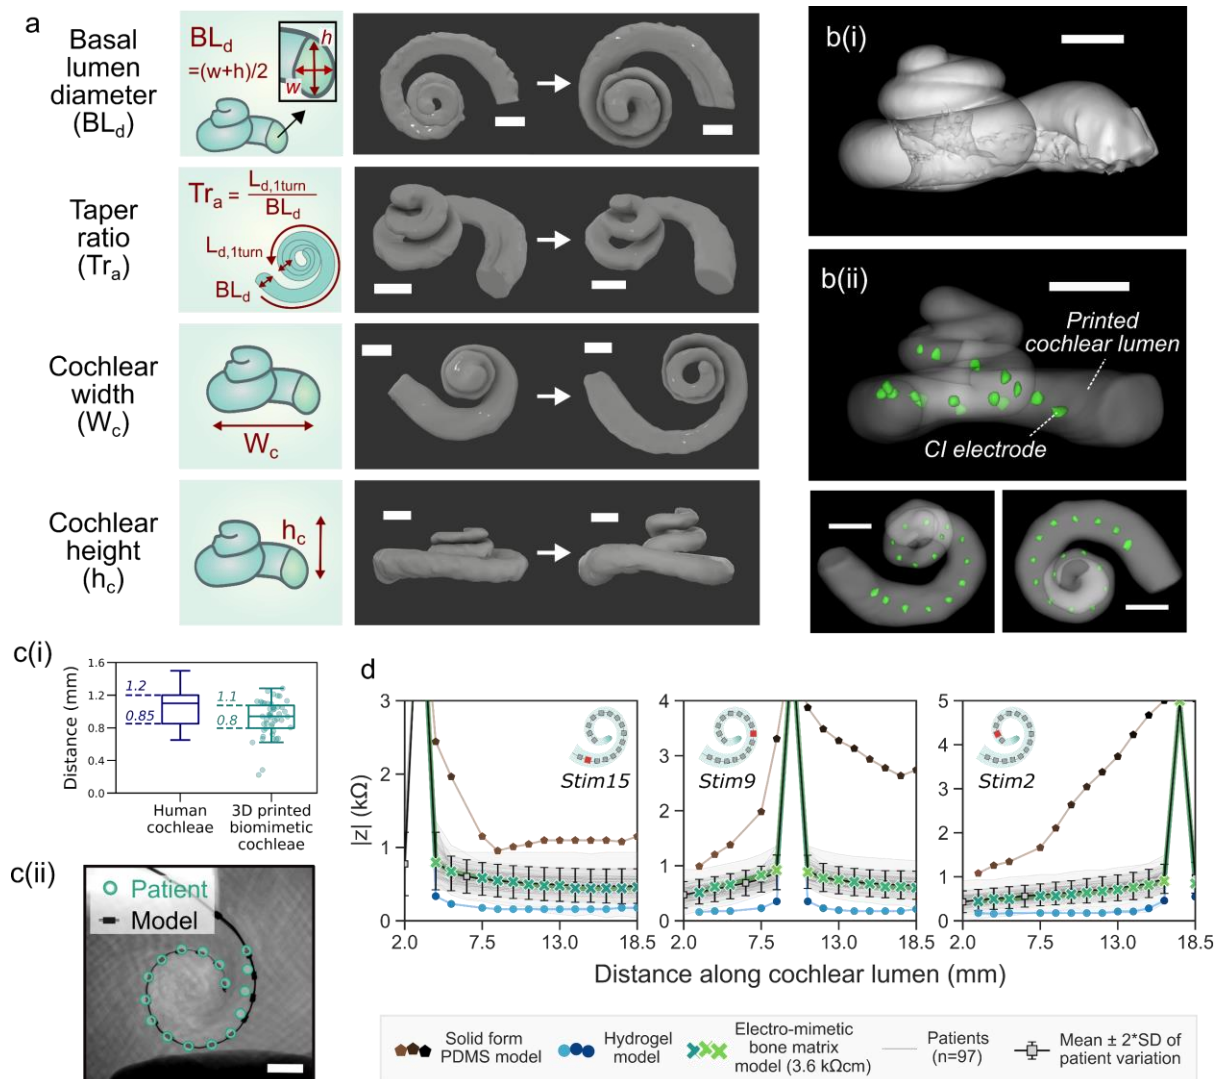

213

214 **a**,  $\mu$ -CT reconstructed images of the spiral lumen of the biomimetic cochlea with different  
 215 geometric features. Scale bar = 2 mm. Four geometric descriptors are used – basal lumen  
 216 diameter, taper ratio, cochlear width, and cochlear height. Detailed definitions and the range  
 217 of the descriptors tested in this study can be found in Supplementary Table 1. **b**,  $\mu$ -CT  
 218 reconstructed images of **(i)** a cadaveric cochlea and **(ii)** the lumen of an exemplar 3D printed  
 219 biomimetic cochlea with CI electrode array (marked green) implanted. Scale bar = 2 mm.  
 220 **c(i)**, The electrode-to-spiral centre distance ( $n = 48$ ) of the biomimetic cochleae, compared to

221 the electrode-to-modiolus distance of human cochleae with the same CI electrode type  
222 implanted (HiFocus™ 1J electrode array), replotted from literature<sup>38</sup>. **c(ii)** Example showing  
223 overlapped CT and x-ray images of the CI electrode positions in a patient's cochlea and in a  
224 biomimetic cochlea that has similar geometric descriptors to the patient ( $n = 3$ ,  
225 Supplementary Fig.7b). Scale bar = 2 mm. **d**, Comparison of the mean patient EFI profile ( $n$   
226 = 97), and the EFI profiles obtained from 3D printed models made of hydrogel, solid PDMS  
227 and electro-mimetic bone matrix (3.6 kΩcm). The mean patient EFI was derived from 97  
228 clinical EFIs that are not paired with CT information (with 91 independently acquired by  
229 Advanced Bionics® and 6 acquired by CI<sup>IJ</sup> from our own repository), on the assumption that  
230 the insertion depths follow the suggested insertion depth of CI<sup>IJ</sup>. EFIs induced by the  
231 stimulations of the basal electrode (electrode 15), the medial electrode (electrode 9) and the  
232 apical electrode (electrode 2) were shown.

233

234 Fig.4b shows high-resolution  $\mu$ -CT scans of a cadaveric cochlea and an exemplar 3D printed  
235 biomimetic cochlea with a CI inserted. It is worth noting that the CI electrode-to-spiral centre  
236 distance displayed in the 3D printed cochleae matches closely with the electrode-to-modiolus  
237 distances measured clinically from patients' CT scans<sup>38</sup> (Fig.4c(i)). Despite only 4 geometric  
238 descriptors being used to describe patient cochlear geometry, biomimetic cochleae with  
239 similar patients' geometric descriptors can approximately capture the overall contour of the  
240 cochlear lumen which encapsulates the length of the CI array (up to 1.5 turn,  $n = 3$ , see  
241 corresponding analysis in Supplementary Fig.7a). Hence, similar plain X-ray imaged  
242 electrode positions and the angular insertion depths were observed in the biomimetic  
243 cochleae and in the patients implanted with the same type of CI (Fig.4c(ii) and  
244 Supplementary Fig.7b). Statistically, the dependence of the CI angular insertion depth on the  
245 cochlear width was also similar, comparing the biomimetic cochlea data and the patient data  
246 (Supplementary Fig.7c). This gives further confirmation that the 3D printed cochleae have  
247 adequate structural rigidity and anatomy to provide geometrically-guided implant insertion  
248 and positioning. It should be noted that since the 3D printed cochleae do not present the  
249 intracochlear membrane structures, the associated volume restriction effects on CI electrode  
250 positioning might not be fully captured in the 3D printed models.

251

252 Next, we acquired intracochlear EFI profiles (normalised intracochlear voltage distribution)  
253 in our cochlear models with a CI<sup>IJ</sup> (Advanced Bionics HiRes 90K<sup>®</sup> implant with HiFocus<sup>TM</sup>  
254 1J electrode) electrode array inserted. EFI samples the intracochlear voltage (V) along the  
255 electrode array in response to a current injection or a stimulation impulse ( $I_{stim}$ ) at each  
256 electrode (Fig.1b). The off-stimulation measurements in EFI profiles contain information  
257 about the induced voltage spread characteristics of the cochlea. EFIs and similar measures  
258 (e.g. transimpedance matrix from Cochlear Corporation<sup>®</sup> or Impedance Field Telemetry from  
259 MED-EL<sup>®</sup>) are commonly used as part of the routine CI clinical assessment.

260

261 To further demonstrate the importance of having a realistic bone matrix resistivity in  
262 reproducing the patient EFI profile, we also fabricated models made of materials with  
263 contrasting conduction properties, hydrogels (representing the highly conductive case) and  
264 solid PDMS (representing the insulating case). Fig.4d shows the mean patient EFI profile  
265 derived from 97 patients compared with the EFI profiles of the 3D printed models with  
266 different matrix material properties. We found that the solid PDMS model led to a steeper  
267 and extremely asymmetrical EFI profile (as seen in the stimulation at the medial electrode),  
268 strongly mismatched with real patient profiles. In comparison, the conductive hydrogel  
269 model resulted in a low magnitude EFI profile, which sits outside the patient population EFI.  
270 By replicating realistic bone resistivities with electro-mimetic bone matrices, our biomimetic  
271 cochlea can be designed to match real patient stimulus spread characteristics.

## 272 **Clinically validated 3PNN shows high statistical predictive performance**

273 By training a neural network (NN) machine learning model with the dataset of EFI profiles  
274 acquired from the 3D printed biomimetic cochleae, a 3D printing and neural network co-  
275 modelling (3PNN) framework (Fig.5a) was established to model the relationship between  
276 EFIs and the electroanatomical features of the CI implanted biomimetic cochleae. Reasons  
277 for using neural network modelling instead of other existing computational models are  
278 discussed in Supplementary Note 2. To support various application needs, we developed  
279 forward-3PNN and inverse-3PNN. Forward-3PNN is used when patients' cochlear geometry  
280 is known (i.e. through a pre-operative CT scan), and the algorithm can predict the most  
281 probable off-stimulation EFIs arising from different electroanatomical descriptors of a  
282 cochlea. The patient-specific EFI prediction covers the initial 2 – 18.5 mm section of a CI  
283 electrode array from different manufacturers that may have different electrode positions and  
284 spacings. Inverse-3PNN is used when a patient EFI is given, and the algorithm can infer the  
285 most probable distribution of the electroanatomical descriptors (i.e. the four geometric  
286 descriptors and the cochlear tissue resistivity) of the patient's cochlea. The broad  
287 applicability of 3PNN on different electrode types (HiFocus<sup>TM</sup> 1J electrode array (CI<sup>1J</sup>),  
288 HiFocus<sup>TM</sup> SlimJ electrode array (CI<sup>SlimJ</sup>), Cochlear<sup>TM</sup> Nucleus<sup>®</sup> slim straight electrode  
289 CI622 and Cochlear<sup>TM</sup> Nucleus<sup>®</sup> slim straight electrode CI522) is validated in  
290 Supplementary Figs.9-13, with its clinical predictive power demonstrated below.

291  
292 We validated the clinical applicability of 3PNN using routinely acquired clinical data of  
293 different implant types. In total, 31 paired sets of patient's CT scan and EFI profile were used  
294 for validation. They were acquired using either a CI<sup>SlimJ</sup> ( $n = 17$ ), a CI622 ( $n = 6$ ), or a CI522  
295 ( $n = 8$ ). Here, we assumed the inputs of the stimulating and the recording electrode positions  
296 follow the manufacturers' suggested insertion depths (Supplementary Table 2) for predicting

297 the most likely outcomes. Starting with our forward-3PNN, we predicted the patients' off-  
298 stimulation EFI profiles based on the four geometric descriptors measured from their CT  
299 scans, while taking the matrix resistivity input as 9.3 kΩcm (the mean reported resistivity of  
300 live human skulls<sup>22-26</sup>, see Supplementary Fig.2a). Without any model adjustment for the  
301 different CI types, 28 out of the 31 EFI reconstructions achieve a MAPE (median absolute  
302 percentage error) < 12% (Fig.5b and Supplementary Fig.11), despite of the limited resolution  
303 of patients' cochlear CT scans, and the substitution of the unknown patient cochlear tissue  
304 resistivities with the reported mean human skull resistivity. For a selected patient (subject  
305 4<sup>CI522</sup>) whose EFI profile matches the population mean EFI ( $n = 97$ ), forward-3PNN was  
306 shown to achieve a MAPE = 8.6% for the EFI reconstruction (Fig.5bi and Supplementary  
307 Fig.12b-c). The capability of 3PNN to give patient-dependent EFI predictions, is confirmed  
308 in Supplementary Table 3 which cross-compares the MAPEs calculated between the patients'  
309 EFIs and the 3PNN predictions, and the MAPEs between the patients' EFIs and the  
310 population mean. Next, we validated our 3PNN by inversely inferring the distribution of the  
311 four cochlear geometric descriptors that could match a patient's off-stimulation EFI profile  
312 with a similarity > 89% (Similarity (%) = 1 - MAPE (%)). Comparing the predicted  
313 distributions of the geometric descriptors with the corresponding patient's features measured  
314 from their CT scans, the median MAPE is ≤ 8% (Fig.5c and Supplementary Fig.13). The  
315 above high statistical prediction accuracy demonstrates the capacity of 3PNN to  
316 autonomously predict clinical EFIs or patients' cochlear features for different electrode types  
317 without further need to adjust the machine learning model that is trained by the dataset  
318 acquired from the CI<sup>1J</sup>.  
319



320 **Fig.5: Clinical Validation of 3PNN.**

321

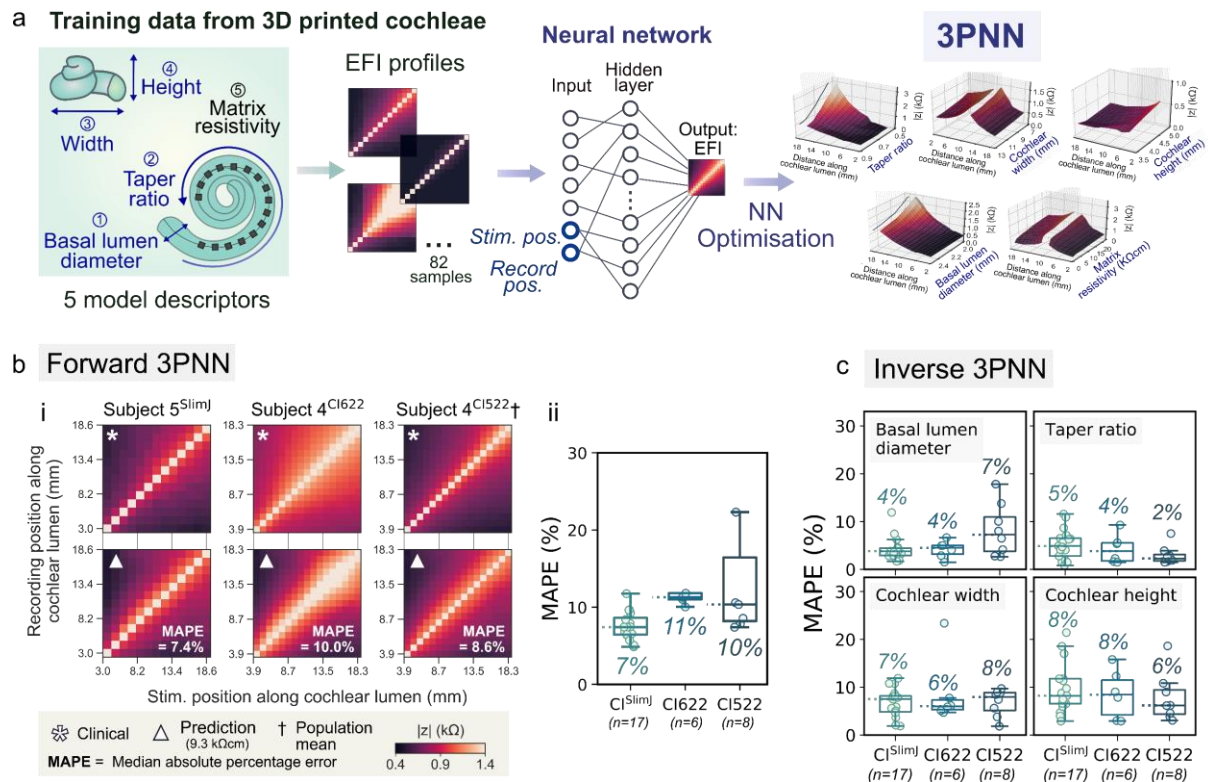

322

323

324 **a**, Schematic of the workflow of 3PNN. 3PNN was developed by training a neural network  
 325 machine learning algorithm with the EFI profiles acquired from the 3D printed biomimetic  
 326 cochleae. 3PNN maps the correlation between the 5 model descriptors and the most probable  
 327 EFI profile as a function of CI electrode position. The hyperparameters of 3PNN were tuned  
 328 using 10-fold cross-validation to achieve the best predictive performance (Supplementary  
 329 Fig.9). **b**, Validation of forward-3PNN for predicting patient off-stimulation EFIs (matrix  
 330 resistivity input = 9.3 k $\Omega$ cm). **(i)** Representative off-stimulation EFI predictions for different  
 331 CI electrode types, as compared to the corresponding clinical patient data; and **(ii)** boxplots  
 332 summarising the overall performance of forward-3PNN, with the median MAPE of each CI  
 333 electrode type indicated on the figure. Full validation results can be found in Supplementary  
 334 Fig.11. **c**, Overall performance of inverse-3PNN for inferring the patients' cochlear  
 335 geometric descriptors for different CI electrode types, with the median MAPE stated for each  
 336 descriptor. Full validation results of inverse-3PNN can be found in Supplementary Fig.13. In  
 337 **b(ii)** and **c**, the line in each box represents the median, with the box denoting the interquartile  
 338 range and the whiskers denoting the  $\pm 1.5$  of the interquartile range.

339

340

## 341 **Effect of cochlear electroanatomy on CI voltage spread**

342 With the validated 3PNN model, we proceeded to investigate how the CI voltage spread  
343 characteristics could be affected by the four geometric descriptors and the matrix resistivity.  
344 Using forward-3PNN, we simulated EFI profiles by sweeping through different combinations  
345 of the 5 model descriptors (examples shown in Supplementary Fig.14). In total, we sampled  
346 3125 (5x5x5x5x5) combinations to represent the entire modelling space of the 5 model  
347 descriptors, and predicted their off-stimulation EFIs. To parameterise the voltage spread  
348 characteristics for each predicted EFI profile, we fitted a power law following Equation (1),  
349 to each stimulus spread toward the apex and toward the base (detailed example shown in  
350 Supplementary Fig.15),

$$|z| = \frac{V}{I_{stim}} = A|x|^{-b} + C \quad (1)$$

$$\frac{d|z|}{dx} = -Abx^{-b-1} \quad (2)$$

351 where  $|z|$  is transimpedance magnitude,  $V$  is voltage between the recording electrode and the  
352 ground electrode,  $I_{stim}$  is stimulation impulse current,  $x$  is distance between the stimulating  
353 and the recording intracochlear electrodes along the CI,  $A$  and  $b$  are fitting coefficients, and  $C$   
354 is baseline constant of the EFI, which is defined as the minimum value of the EFI. Equation  
355 (1) was adopted here because, theoretically, volume conduction from a point source in a  
356 homogeneous medium should follow an inverse relationship with the form of  $|z| = \frac{1}{4\pi\sigma r}$   
357 (where  $\sigma$  is conductivity of the homogeneous medium and  $r$  is distance between the  
358 stimulating and the recording intracochlear electrode)<sup>39</sup>, and the constant  $C$  captures the  
359 baseline feature of EFIs as  $|z|$  approaches the baseline when  $x \rightarrow \infty$ . Our goodness-of-fit test  
360 in Supplementary Fig.16 also supports the use of Equation (1) to describe EFI features. To  
361 quantify the slope of the stimulus spreads, we computed the derivative of Equation (1) fitted  
362 EFI with respect to  $x$  (as shown in Equation (2)) for toward the apex or toward the base

363 directions, and used the mean slope at the  $x = 1$  mm position ( $\overline{\text{Slope}}_{x=1\text{mm}}$ ) as an indicator of  
364 the sharpness of voltage drop toward the apex and the base of the cochlea.

365

366 As shown in Fig.6a, we found that the voltage drop is shallower (smaller  $\overline{\text{Slope}}_{x=1\text{mm}}$  value)  
367 in cochleae with larger basal lumen diameter and less tapered cochlear lumen (i.e. taper ratio  
368 closer to 1). Therefore, we predict that cochleae with these geometric features could  
369 experience broader ‘current spread’, which may activate neurons over a broader spatial  
370 region (thus broader spectral convolution). It should be noted, however, that the activation  
371 function for neurons should also be considered for a more sophisticated prediction of the  
372 induced firing of neurons<sup>40</sup>. To further evaluate the relative importance of each descriptor on  
373 EFI and its parametric fitting coefficients (i.e.  $\overline{\text{Slope}}_{x=1\text{mm}}$  and the baseline constant  $C$  in  
374 Equation (1)), we performed a global sensitivity analysis (see Methods, Supplementary  
375 Fig.17 and Supplementary Tables 4-5). The finding suggests that the taper ratio is the most  
376 important factor affecting the sharpness of voltage drop ( $\overline{\text{Slope}}_{x=1\text{mm}}$ ), whereas the matrix  
377 resistivity and the cochlear width are the dominant factors affecting the baseline constant ( $C$   
378 in Equation (1)).

379

### 380 **On-demand creation of biomimetic cochleae inheriting patient EFIs**

381 The clinical validation of 3PNN demonstrates that the 3D printed biomimetic cochleae can  
382 reproduce the off-stimulation EFIs of CI users with high fidelity, despite the physical  
383 simplicity of the models. With this validated platform, we further demonstrate its application  
384 to construct on-demand cochlear models that can yield patient-specific off-stimulation EFI  
385 profiles. To do this, we first used inverse-3PNN to obtain the distribution of the model  
386 descriptors that could match each patient’s off-stimulation EFI profile with an average

387 similarity over 90% (Fig.6b(i) and Supplementary Fig.18). Subsequently, embedded 3D  
388 printing was used to fabricate a patient-specific biomimetic cochlea exhibiting the features of  
389 the median set of the model descriptors inferred from inverse-3PNN. As shown in Fig.6b(ii),  
390 the EFI profiles measured from the 3D printed biomimetic cochleae show good resemblance  
391 to their corresponding patients' off-stimulation EFI profiles, with MAPE < 12%, while the  
392 patients' EFI profiles show a dissimilarity of > 30% MAPE.

393

394 Beyond the application of reproducing patient-specific EFI profile with a physical 3D printed  
395 model, our platform further points to the potential occurrence of atypical EFI profiles, such as  
396 the 'mid-dip' characteristics observed in patients. The 'mid-dip' characteristic (Fig.6c),  
397 which is distinguished by a dip in the EFI profile at the medial electrodes, has not been given  
398 a clear clinical explanation. It is uncertain whether unusual implantation orientations or  
399 patient-specific cochlear biologic properties could be the origin. By visualising the positions  
400 of electrodes in our 3D printed models with  $\mu$ -CT imaging, we found that the electrode  
401 position, which was guided by the cochlear geometry, could be a potential explanation. In the  
402 model with the 'mid-dip' characteristics, the electrode positions appear to change abruptly  
403 (left panel in Fig.6c(iii)), where electrode 8 (e8) was adjacent to two 'near-wall' electrodes  
404 (e9 and e10) that were in close proximity to the spiral centre. This sudden decrease in the  
405 electrode-to-wall distance can potentially cause a slight increase in the EFI profile, hence a  
406 dip at e8 in the profile. On the contrary, in the model without the 'mid-dip' characteristics,  
407 the electrode positions changed gradually. This suggests that the relative position of the  
408 electrode to the neighbouring electrodes and the lumen wall can be one of the causes giving  
409 rise to the mid-dip abnormality in the EFI profile.

410

411 **Fig.6: Broad applicability of 3PNN for clinical informatics.**

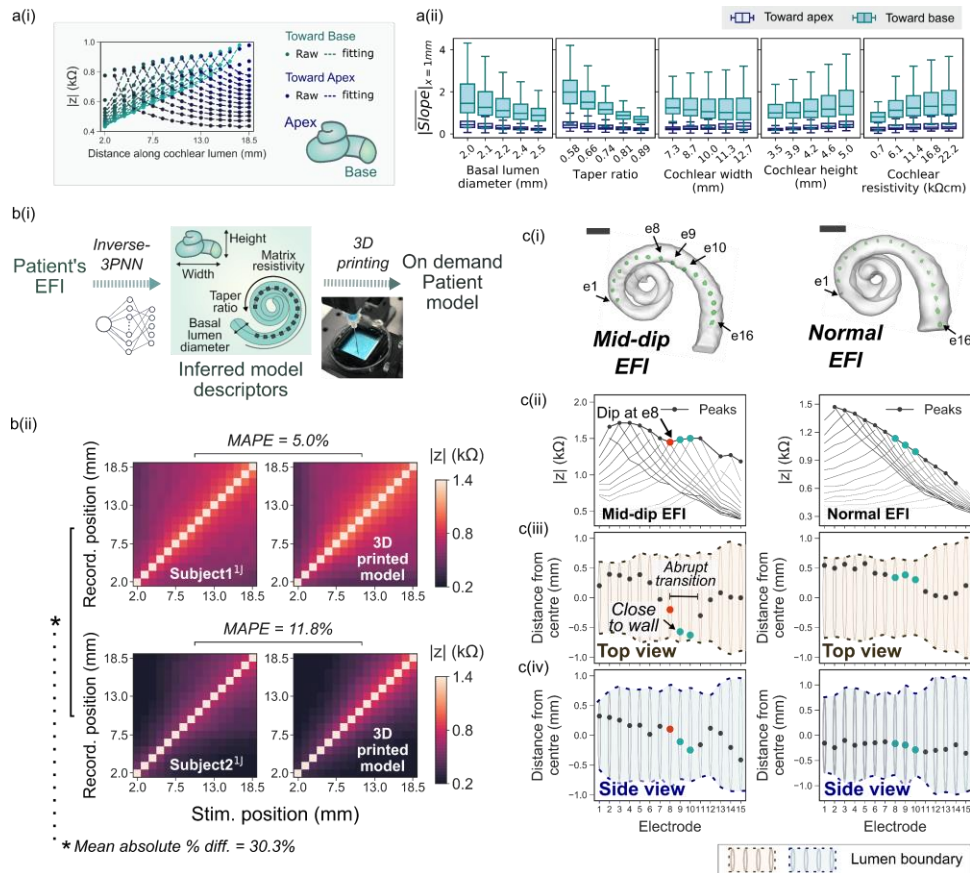

412

413 **a, (i)** Schematic showing the stimuli spreads towards the apex and the base of the cochlea in  
 414 an EFI. **(ii)** The trend of  $\overline{\text{Slope}}_{x=1\text{mm}}$  of the stimulus spreads toward the cochlear apex and  
 415 the cochlear base across each model descriptor. The line in the box represents the median of  
 416 the  $\overline{\text{Slope}}_{x=1\text{mm}}$  of 625 (5x5x5) predicted samples, with the box denoting the interquartile  
 417 range and the whiskers denoting the  $\pm 1.5$  of the interquartile range.  $n = 625$  inferred using  
 418 the model descriptors sampled uniformly in the modelling space. **b, (i)** Schematic showing  
 419 the process to generate the patient-specific biomimetic cochlear model, where inverse-3PNN  
 420 was used to deduce the distribution of the model descriptors best-fitting the patient off-  
 421 stimulation EFI, and the patient cochlear model was then fabricated by 3D printing with a  
 422 predicted set of the model descriptors (Supplementary Fig.18). **(ii)** Comparison of the off-  
 423 stimulation EFIs of two patients and the off-stimulation EFIs acquired in their corresponding  
 424 biomimetic cochleae. **c,** The electrode positions in a model showing an atypical 'mid-dip'  
 425 EFI profile (left) and a model with a typical EFI profile (right). **(i)** Reconstructed 3D  $\mu$ -CT  
 426 volumes of the cochlear lumens of the biomimetic cochleae with a CI electrode array inserted  
 427 (marked green). Scale bar = 2 mm; **(ii)** Off-stimulation EFI profiles of the models with the  
 428 peaks indicating the maximum  $|z|$  of the spread distributions at off-stimulation positions; **(iii)**  
 429 Top view and **(iv)** side view of the cochlear lumens of the models, showing the positions of  
 430 the electrodes in the lumens of the models relative to the lumen wall. Distance in the negative  
 431 direction refers to the distance towards the cochlear centre, vice versa. Electrode 8 (red) and  
 432 electrodes 9 – 10 (blue) are highlighted to contrast the electrode contour which generates the  
 433 mid-dip EFI.

## 434 **Informing patient-specific cochlear tissue resistivity**

435 As the absolute resistivity of patients' temporal bones near the cochlear vicinity cannot be  
436 measured non-invasively in living subjects, our inverse-3PNN further presents a unique  
437 capability in inferring the resistivities of patients' cochlear tissues based on their individual  
438 EFI profiles. Supplementary Fig.19 shows the ranges of the patient-specific resistivities ( $n =$   
439 37), which were deduced with unknown geometric descriptors for subjects<sup>IJ</sup> 1 – 6 and with  
440 paired pre-operative CT (thus known patient geometric descriptors) for the remaining 31  
441 subjects. All the predicted patient resistivity ranges (0.6 – 20.3 k $\Omega$ cm) lie within the reported  
442 resistivity range of live human skulls (0.6 – 26.6 k $\Omega$ cm)<sup>22–26</sup>. In particular, the mean  
443 predicted patient cochlear resistivity (6.6 k $\Omega$ cm,  $n = 37$ ) is close to the mean reported  
444 resistivity of live human skulls (9.3 k $\Omega$ cm).

445

## 446 **Discussion**

447 We created a physical library of 3D printed biomimetic cochlear models that statistically  
448 captures the reported broad spectrum of off-stimulation EFI profiles of CI patients, which are  
449 dependent on the patterns of electrical conduction through tissues. The 3D printed cochlear  
450 models can be used multiple times (Supplementary Fig.5c-d) and were designed with  
451 impedance-tuneable electro-mimetic bone matrices that display suitable mechanical stiffness  
452 for geometrically-guided CI electrode insertion, while limiting damage to CI electrodes  
453 during insertion. Complementary to FEM, the 3D printed biomimetic cochleae offer a robust  
454 physical means to replicate the dynamics of ionic conduction and the electron-ion interaction  
455 in cochleae with implanted CIs. This is useful as it bypasses the sensitivity in the choice of  
456 boundary conditions that are required in FEM (Supplementary Fig.1a), and it intrinsically  
457 captures physical phenomena that could be difficult to replicate fully in FEM.



458 The use of standard-of-care patient CT scans in 3PNN is practical for clinical translation  
459 because high-resolution micro-CT scans cannot be performed in living patients. As the  
460 associated resolution of clinical CT scans does not allow for detailed construction of cochlear  
461 surface contours, nor the inclusion of the membranous structures (~2 to 4  $\mu\text{m}$  thick as  
462 reported in literature<sup>10,41</sup>), 3PNN does not aim to capture the thorough structural details of  
463 human cochleae. Several potential sources of uncertainty are noted in 3PNN. These include  
464 the discrepancy caused by the absence of the intracochlear membranes in the 3D printed  
465 models, the uncertainties in the measurements of the low-resolution clinical CT scans, the  
466 deviations in the vertical position of CI electrode array in cochlear lumen, the deviations in  
467 the CI electrode insertion depth due to different surgical practices, and the dimensional  
468 discrepancy between the patient's cochlea and the cochlear lumen described using the four  
469 geometrical descriptors. Their potential effects on EFIs are summarized in Supplementary  
470 Table 6. In addition, the 3D printed cochleae did not account for the frictional force generated  
471 during CI electrode insertions beneath the basilar membrane in human cochleae, which may  
472 occasionally cause electrode array buckling or even intracochlear trauma affecting CI  
473 performance<sup>42,43</sup>. We suggest that friction could have attributed to the localised buckling  
474 configuration of the CI electrode array captured in the 3D model giving the 'mid-dip' EFI.  
475 Future studies can explore the possibility of incorporating the membranous structures into 3D  
476 printed cochlear models, and coupling computational mechanics in the modelling process.  
477  
478 Adopting machine learning along with parametric descriptions of the cochlear geometry,  
479 3PNN requires only a fraction of the computation time per EFI prediction (estimated 300  
480 times faster) compared to our FEM models (for Intel i5 CPU). The fast and automated nature  
481 of 3PNN facilitates the generation of sufficient amount of simulated data for deciphering  
482 trend and sensitivity in a high dimensional problem. This is imperative for solving the

483 ‘volume conduction’ problem, the first step in computational neuroengineering for modelling  
484 electrical stimulation in a biological structure<sup>20</sup>. Our work also suggests that the intracochlear  
485 excitation spread can be largely reproduced by physically replicating the volumetric  
486 conduction within the cochlear lumen and the cochlear tissue vicinity without biological  
487 components. Further studies that evaluate the correlation between the intracochlear voltage  
488 distribution and the excitation of neural cells will be of particular benefit to expand the use of  
489 3PNN in modelling the signal perception at the neuronal level.

490

491 Our framework could potentially provide the first approach to readily infer the *in vivo* bulk  
492 resistivity of individual patient’s cochlear bone matrix via CI telemetry. Validation of the  
493 accuracy of the cochlear tissue resistivity prediction is not performed in the current work; this  
494 is because, as of yet, there is no reported method to measure cochlear tissue resistivity in live  
495 patients. In the present work, a default resistivity value of 9.3 kΩcm (mean resistivity of live  
496 human skull) was used to approximate the patient-specific resistivity of cochlear tissues in  
497 forward-3PNN. Thus, providing future validation to the inferred mean cochlear tissue  
498 resistivities (e.g. 6.6 kΩcm,  $n = 37$ ) can potentially further improve the predictive power of  
499 forward-3PNN. Alternatively, future investigations which explore the correlation between the  
500 3PNN inferred cochlear tissue resistivity and the cochlear physiological and pathological  
501 status, may provide a foundation for the use of CI telemetry as a diagnostic indicator. This  
502 might enable the detection of early abnormalities after CI implantation, without resorting to  
503 imaging methodologies that use ionizing radiation in patients (which particularly should be  
504 avoided in children).

505

506 Overall, 3PNN was demonstrated to be predictive for correlating the off-stimulation EFI and  
507 the geometric parameters collected from clinical patient CTs, without the need for model

508 adjustment and re-calibration. This was validated with clinical EFI data of four different CI  
509 types (up to a position of 18.5 mm along the cochlear lumen), and 28 out of 31 predictions  
510 show good accuracy, MAPE < 12% (median MAPE = 8.6%). Therefore, the co-modelling  
511 framework has a potential capability of forecasting the stimulation performance of CIs from  
512 different manufacturers, hence assisting the development of CI electrode arrays tailored to  
513 patient's cochlear anatomy. Comparing to conventional animal and cadaver models, the  
514 'print-and-learn' modelling concept proposed here offers a physical-manipulatable, ethical  
515 and economic approach, which may help reduce the need for animal experiments.  
516 Complemented with FEM, 3PNN could form a building block for future cochlear digital  
517 twins for CI testing. With the rising usage of neuromodulating electronic implants, we  
518 anticipate that our 'print-and-learn' co-modelling concept could facilitate the physical  
519 modelling and digital twin innovation of other bioelectronic implant prototypes, beyond its  
520 applications in CIs.  
521

## 522 **Methods**

### 523 **3D printing material preparation**

524 The fugitive ink was prepared by dissolving 30 w/v% Pluronic F127 (P2443, Sigma-Aldrich)  
525 in a 1 w/v% NaCl (10616082, Fisher Scientific) solution. For creating 3D printed models  
526 made of PDMS or electro-mimetic bone matrices, PDMS elastomer (Sylgard™ 184 Dow,  
527 10:1 base polymer to curing agent ratio) was used. The pre-crosslinked mixture was poured  
528 in a petri dish, and degassed in a vacuum desiccator for at least 3 hours prior to printing. For  
529 preparing 3D printed models made of hydrogels, hydrogels were prepared with 1 w/v% NaCl  
530 solution as the base solution according to their weight/volume concentration (w/v%) listed in  
531 Supplementary Fig.5a. The types of hydrogels investigated were gelatin from porcine skin  
532 (G1890, Sigma-Aldrich), xanthan gum (G1253, Sigma-Aldrich), agarose (A9539, Sigma-  
533 Aldrich), gellan gum (P8169, Sigma-Aldrich); the types of fillers were talc (243604, Sigma-  
534 Aldrich), hydroxyapatite (21223, Sigma-Aldrich) and PDMS microbeads.

535

### 536 **Embedded 3D printing of biomimetic cochleae**

537 All models were fabricated with a bespoke multi-material robotic bioprinter. Five model  
538 descriptors (basal lumen diameter, taper ratio, cochlear width, cochlear height, and matrix  
539 resistivity) were used to define the model features. Prior to the fabrication process, the  
540 structure of the microchannels in the PDMS matrix was designed on Slic3R (1.3.0,  
541 slic3R.org) for tuning the void in the electro-mimetic bone matrix to achieve the desired  
542 matrix resistivity (Supplementary Fig.3a). The correlation between the resistivity of the  
543 electro-mimetic bone matrix and its void fraction can be found in Supplementary Fig.3e. The  
544 printing path of the microchannel structure was then converted to Gcode using Slic3R.

545

546 In the fabrication process (Supplementary Video 2), first, the sacrificial interconnected grid  
547 network designed above was embedded printed inside uncured PDMS using a 30 w/v%  
548 Pluronic F127 ink. At ambient temperature, Pluronic F127 ink at 30 w/v% retains its 3D  
549 structural integrity inside the PDMS matrix, and the interconnected network provides  
550 sufficient mechanical support for the following embedded printing of a cochlea-shaped  
551 structure. Next, a cochlea-shaped spiral was printed inside the electro-mimetic bone matrix.  
552 The printing path of this cochlea-shaped structure was defined by the four geometric  
553 descriptors and a spiral trajectory derived from the mathematical model of human cochlear  
554 geometry developed by Pietsch et al.<sup>44</sup>. The correlation between the dimensions of the  
555 features and the process parameters of the printer can be found in Supplementary Fig.22. The  
556 distances between the edges of the model and the printed cochlear lumen are at least 4 mm to  
557 ensure that the boundary is far enough and will not cause any effect on the EFI measurement.  
558 The total printing time of a model ranges from 30 min to 3 hrs depending on the density of  
559 the embedded interconnected channels. After printing, the matrix was cured at 60 °C in an  
560 oven for 3 hrs and stored in a bath of 1 w/v% NaCl solution at 4 °C for dissolving the  
561 sacrificial Pluronic F127 embedded in the electro-mimetic bone matrix. The NaCl bath was  
562 changed several times to ensure that all Pluronic F127 inside the matrix was removed. In  
563 total, 82 biomimetic cochlear models with different combinations of model descriptors were  
564 fabricated. The specifications of the 82 models can be found in Supplementary Table 7.  
565  
566 The hydrogel and hydrogel-fillers models were similarly fabricated but without the procedure  
567 of creating the microchannel networks. The composition of the models tested in this study  
568 can be found in Supplementary Fig.5a. The hydrogel and hydrogel-fillers solutions were  
569 heated at 40 °C during printing to maintain a liquid state. The models were then solidified at  
570 room temperature via thermal crosslinking<sup>45</sup>.

## 571 **EFI measurements in 3D printed biomimetic cochleae**

572 Prior to measurement, the 3D printed biomimetic cochleae were flushed with a 1 w/v% NaCl  
573 solution to ensure no bubble trapped in the microchannels and the cochlear lumen of the  
574 models. 1 w/v% NaCl solution was used here as it has a similar resistivity to the conductive  
575 perilymph inside human cochleae (Supplementary Fig.3c). All EFI (or transimpedance  
576 matrix) measurements of the 3D printed models were obtained using either an Advanced  
577 Bionics (AB) HiRes 90K<sup>®</sup> implant with HiFocus<sup>™</sup> 1J electrode array (CI<sup>1J</sup>), an Advanced  
578 Bionics HiRes<sup>™</sup> Ultra implant with HiFocus<sup>™</sup> SlimJ electrode array (CI<sup>SlimJ</sup>) or a  
579 Cochlear<sup>™</sup> Nucleus<sup>®</sup> Profile with slim straight electrode (CI522). Both CI<sup>1J</sup> and CI<sup>SlimJ</sup> have  
580 16 electrodes in total with electrode 1 being the apical-most electrode and electrode 16 being  
581 the basal-most electrode. CI522 has 22 electrodes in total with electrode 22 being the apical-  
582 most electrode and electrode 1 being the basal-most electrode. The electrode array was  
583 inserted in the cochlear lumen of the model until the distal marker of the electrode array was  
584 positioned at the lumen opening of the model, as illustrated in Supplementary Fig.23, and the  
585 model was placed on top of the extracochlear case ground of the CI (known as the ‘case  
586 ground’ of CI<sup>1J</sup> and CI<sup>SlimJ</sup>, or the ‘MP2 plate extracochlear electrode’ of CI522). The EFI  
587 profiles were acquired using the telemetry function of the CI with either the AB Volta version  
588 1.1.1 software (research only) or Custom Sound<sup>®</sup> EP 5.1 (with research option) using the  
589 default stimulation and recording settings. The default stimulation and recording setting used  
590 in AB Volta software is a biphasic pulse with pulse width and amplitude of 36  $\mu$ s (equivalent  
591 Fourier fundamental frequency  $\sim$ 14 kHz) and 32  $\mu$ A, and a maximum sampling rate of 56  
592 kHz, whereas Custom Sound<sup>®</sup> EP 5.1 employs a setting of a biphasic pulse with pulse width  
593 and amplitude of 25  $\mu$ s (equivalent Fourier fundamental frequency  $\sim$ 20 kHz) and 125  $\mu$ A  
594 respectively. During the acquisition of EFI, each electrode was activated individually at a  
595 time in monopolar mode, and subsequently other electrodes measured the resulting voltage at



596 their positions. All electrodes on the electrode array were activated one-by-one to generate  
597 the entire EFI profile. Electrodes 12 and 16 of the CI<sup>IJ</sup> electrode array were missing as  
598 received, but this does not affect the measurements of other electrodes and the general shape  
599 of the EFI profile. For all the data presentations, the on-stimulation EFI data (contact  
600 impedance) were not compared, due to the fact that on-stimulation EFI data is dominated by  
601 the electrode interface resistance<sup>7,46</sup> and do not inherently reflect the electroanatomical  
602 characteristics of human cochleae (or the 3D printed biomimetic cochleae); and on-  
603 stimulation EFI data varies over time<sup>47</sup> and among different CIs.

604

## 605 **Resistivity measurements**

### 606 *Resistivities of NaCl solutions, hydrogels and hydrogel-fillers matrices*

607 Impedance properties of NaCl solutions at various concentrations (Supplementary Fig.3c),  
608 hydrogel and hydrogel-fillers matrices (Supplementary Fig.5a) were measured using a four-  
609 terminal configuration with Solartron 1260 impedance analyser and SMaRT 3.0.1 software.  
610 In this configuration, the current was passed through the sample using two 1.25 cm<sup>2</sup> square  
611 electrode plates, and the voltage was measured using two separate inner electrodes.  
612 Resistivity was converted from the plateau impedance magnitude using the following  
613 relation,

$$\rho = |z| \frac{A}{d} \quad (3)$$

614

615 where  $\rho$  = the resistivity of the sample (plateau value),  $|z|$  = the plateau impedance magnitude,  
616  $A$  = the area of the electrode plate in contact with the sample, and  $d$  = the spacing between the  
617 two inner electrodes, which was 8.4 mm here.

618

## 619 *Resistivities of electro-mimetic bone matrices*

620 The resistivity of the electro-mimetic bone matrix  $\rho_{matrix}$  associated with the plateau  
621 impedance magnitude ( $\sim 300$  Hz – 100 kHz) was determined using transmission line method  
622 ( $n \geq 3$ ). In this method, each sample was segmented into at least 4 segments. Impedance of  
623 each segment was obtained using a two-terminal configuration with Solartron analyser, and  
624 the width of each segment was measured. The total impedance  $Z_{tot}$  can be expressed by  
625  $Z_{tot} = Z_c + Z_{sample}$ , where  $Z_c$  is the contact impedance between the electrode plates and the  
626 samples, and  $Z_{sample}$  is the impedance of the sample. The plateau value of the total impedance  
627 magnitudes  $|Z_{tot}|$  of the segments were therefore plotted against the widths of the segments  $L$ ,  
628 and a linear regression was then used to fit the experimental data (see Supplementary Fig.3d).  
629  $\rho_{matrix}$  was determined by multiplying the gradient of the linear regression  $\frac{\partial |Z_{tot}|}{\partial L}$  with the area  
630 of the electrode plate in contact with the sample  $A$ , denoted as follows:

$$\rho_{matrix} = A \frac{\partial |Z_{tot}|}{\partial L} \quad (4)$$

631

## 632 **Electrochemical impedance spectroscopy (EIS) measurements**

633 Electrochemical impedance spectroscopy measurements of a human cadaveric cochlea in a  
634 head, and 3D printed cochlear models made of hydrogel and electro-mimetic bone matrix  
635 were carried out using an impedance analyser (RS PRO LCR-6100) with a three-terminal  
636 configuration<sup>48</sup>. The measurements were taken at frequencies ranging from 10 Hz to 100  
637 kHz, which covers the most common operating frequencies of CIs.

638

## 639 **Micro-computed tomography scans of the 3D printed biomimetic cochleae**

640 CT scans of samples were acquired using a micro-CT microscope (ZEISS Xradia 510 Versa)  
641 with the following scanning parameters: Source filter LE2, tube voltage 80 kV, tube current  
642 88 mA, exposure time 2 s, Bin 2, image taken 1024 and pixel size 17.8  $\mu\text{m}$ . The volume

643 rendering of the samples was carried out using 3D Slicer (Version 4.10.2, [www.slicer.org](http://www.slicer.org)<sup>49</sup>).  
644 The dimensions of the samples were measured using the measurement tool in 3D Slicer.  
645 To evaluate the positions of electrodes in the samples and to avoid the image distortion  
646 caused by the metallic artifacts from electrodes, pre- and post-insertion CT scans of the  
647 samples were acquired. CT volume of the cochlear lumen of the sample was rendered from  
648 the pre-insertion CT scan where there is no metallic artifact, whereas CT volume of the  
649 electrode array in the sample was rendered from the post-insertion CT scan. The two CT  
650 volumes were then aligned, and the relative position of each electrode from the centre of the  
651 cross-sectional plane of the cochlear lumen was measured using ImageJ. The 2D images of  
652 the electrode array inside the cochlear lumen of the samples were acquired using the  
653 following parameters: tube voltage 80 kV, tube current 88 mA, exposure time 5 s, Bin 2 and  
654 pixel size 25.6  $\mu\text{m}$ .

655

### 656 **Patient EFI profiles and CT scans**

657 The use of anonymous patient EFI profiles with or without paired CT scans in our study was  
658 approved by the University of Cambridge Human Biology Research Ethics Committee  
659 (HBREC.2019.42) and the Cambridge Biomedical Research Centre (Ref: A095451).  
660 Informed consent from the human participants is not required for this study as the clinical  
661 data used here are retrospective and anonymous. In total, 128 clinical intra-operative EFIs  
662 (also known as transimpedance matrix profiles) were used in this study. Of the 128 profiles,  
663 91 profiles (without paired CT scan data) were kindly provided by Advanced Bionics<sup>®</sup> and  
664 the rest were obtained from 37 anonymous patients (31 with paired CT scan data and 6  
665 without paired CT data) who have undergone cochlear implantation at the Emmeline Centre  
666 for Hearing Implants in Cambridge, UK. As the implant types of the EFIs provided by  
667 Advanced Bionics<sup>®</sup> are not known, their insertion depths were assumed to be equal to the

668 suggested insertion depth of HiFocus™ 1J electrode array. The 37 anonymous EFI profiles  
669 acquired in our centre were randomly chosen to represent the variation in the patient data  
670 without CT scans ( $n = 97$ ) (Supplementary Fig. 12a). Out of the 37 EFI profile data sourced  
671 from our centre, 6 profiles were acquired from the Advanced Bionics HiRes 90K® implant  
672 with HiFocus™ 1J electrode array, 17 profiles from the Advanced Bionics HiRes™ Ultra  
673 implant with HiFocus™ SlimJ electrode array, 6 profiles from the Cochlear™ Nucleus®  
674 Profile Plus with slim straight electrode CI622, and 8 profiles from the Cochlear™ Nucleus®  
675 Profile with slim straight electrode CI522. These EFI profiles were collected using the  
676 telemetry function of the CI with either the AB's Volta 1.1.1 software (research only) and the  
677 Custom Sound® EP 5.1 software (with TIM research option) using the default stimulation and  
678 recording settings.

679

680 Thirty-one CT scans of the patients (which had paired EFI) implanted via the round window  
681 approach with either a HiFocus™ SlimJ electrode array ( $n = 17$ ), a Cochlear™ Nucleus®  
682 CI622 electrode ( $n = 6$ ), or a Cochlear™ Nucleus® CI522 electrode ( $n = 8$ ) were used in the  
683 validation of 3PNN. They were obtained as part of the routine pre-operative assessment at  
684 our centre, and were acquired in helical scan mode using Siemens scanners (Siemens Flash  
685 and Siemens Definition AS) with tube voltage of 120 kV and automatic tube current ranging  
686 from 139 to 214 mA. The images were reconstructed at a resolution of 0.4 x 0.4 x 0.4 mm  
687 using Siemens 80u bone reconstruction algorithm in axial plane.

688

### 689 **Development of 3PNN**

690 3PNN was developed by employing a multilayer perceptron (MLP), a class of feedforward  
691 artificial neural network (NN), to learn the mapping from the inputs (the 5 model descriptors  
692 of the biomimetic cochleae, the stimulus position and the recording position) to the outputs

693 (EFI, also known as transimpedance matrix profiles) (see Fig.5a, for detail of the choice of  
694 model see Supplementary Note 2). A MLP model is a fully connected network that consists  
695 of an input layer, hidden layers and an output layer of perceptrons (or nodes), and by varying  
696 the weight of how each of the nodes are connected, it approximates the complex relationship  
697 between the inputs and the output<sup>50</sup>. The activation function of the nodes was chosen to be  
698 the rectified linear unit (ReLU) function. Tensorflow<sup>51</sup> (version 2.1.0), an open source Python  
699 library, was used to construct the MLP models. 3PNN was trained using backpropagation  
700 with the Adam stochastic optimization method<sup>52</sup>. Since 3PNN was developed based on the  
701 EFI profiles acquired by AB HiFocus<sup>TM</sup> 1J electrode array with electrodes at 2 – 18.5 mm  
702 along the cochlear lumen<sup>53</sup>, the predictable positions of EFIs are 2 – ~18.5 mm along the  
703 cochlear lumen.

704

705 The performance of NN models depends on a good setting for hyperparameters, a grid search  
706 varying the number of hidden layers from 1 to 10 (1, 2, 3, 5, 10) and nodes from 16 to 64 (16,  
707 24, 32, 64) was performed to determine the best performing hyperparameters (see  
708 Supplementary Fig.9 for detail of the hyperparameter tuning). The best performing  
709 hyperparameters were defined as the hyperparameters that yield the highest average  $R^2$  score  
710 and the smallest average median absolute percentage error (MAPE) in 10-fold cross-  
711 validation<sup>54</sup>. We found that the model trained with 1 hidden layer and 32 nodes has the  
712 highest average  $R^2$  score (0.87) and a smallest MAPE (11.9%). After tuning the  
713 hyperparameters, the 3PNN was retrained on the full dataset with the best performing  
714 hyperparameters to produce the final model.

715

716 Inverse prediction was carried out by the Approximate Bayesian Computation-Sequential  
717 Monte Carlo (ABC-SMC) algorithm<sup>55</sup>. ABC is a computational framework under Bayesian

718 statistics that uses a sequence of intermediate threshold [ $\varepsilon_0 > \varepsilon_1 > \varepsilon_2 > \varepsilon_3 > \dots > \varepsilon_f$ ] to  
719 converge towards the optimal approximate posterior distribution through a number of  
720 intermediate posterior distributions. Here, the algorithm infers the distribution of the model  
721 descriptors that leads to an EFI profile with a MAPE less than a predefined threshold ( $\varepsilon_f$ ) to  
722 the given EFI profile.  $\varepsilon_f$  was determined as the smallest MAPE the programme could reach  
723 from the previous threshold level within two hours when running the programme with a  
724 threshold sequence from 20% to 2% in increments of 0.5% (predictions with unknown  
725 geometric descriptors) or 0.1% (predictions with known geometric descriptors), which is  
726 subject to the noise level of the data. To approximate the final posterior distribution (which  
727 does not have a closed-form expression), for each inverse prediction, 1,000 samples of the  
728 posterior distribution of the model descriptors were plotted. PINTS<sup>56</sup>, an open-source Python  
729 package, was used to perform the inference and sampling.

730

### 731 **Clinical predictions of 3PNN**

732 As this study aims to predict the most likely EFI outcomes, in all predictions, the stimulating  
733 and the recording electrode positions were assumed to follow the CI specification, as shown  
734 in Supplementary Table 2. In the validation of forward-3PNN, patients' model descriptors  
735 measured from their CT scans and the mean reported resistivity of live human skulls (9.3  
736 k $\Omega$ cm) were used as the inputs in the forward predictions of patient EFIs. EFI arising from  
737 off-stimulation positions up to 18.6 mm along the cochlear lumen were predicted and  
738 compared with the corresponding EFI measurements acquired in patients. Each forward  
739 prediction takes  $\sim 0.4$  s. For all inverse predictions performed in this study, patients' model  
740 descriptors were predicted using their off stimulation EFI profiles up to 18.6 mm along the  
741 cochlear lumen. Supplementary Table 8 summarises the values of the final MAPE threshold,  
742  $\varepsilon_f$ , used in the inverse predictions in this study.



743

#### 744 **Production of 3D printed models that give patient-specific EFI profiles**

745 Two extreme on-demand 3D printed models that give patient-specific EFI profiles were  
746 fabricated using the medians of the predicted model descriptors acquired from inverse-3PNN,  
747 as stated in Supplementary Fig.18 (matrix resistivity 6.5 versus 0.7 k $\Omega$ cm, taper ratio 0.95  
748 versus 0.71, basal lumen diameter 2.4 versus 2.3 mm, cochlear width 9.6 versus 11.8 mm,  
749 and cochlear height 4.3 versus 3.9 mm). The EFIs of the models were measured using a  
750 HiFocus<sup>TM</sup> 1J electrode array, which is the same type of electrode implanted in the patients.

751

#### 752 **Sensitivity analysis for 3PNN**

753 Sobol's method<sup>57</sup>, a global sensitivity analysis technique for nonlinear models, was employed  
754 to investigate the contribution of each 3PNN model descriptor to the model output (EFI) and  
755 its summary statistics (Supplementary Fig.17 and Supplementary Tables 4-5). A total of  
756  $1.68 \times 10^5$  samples of model descriptors were generated using Saltelli's sequence<sup>58</sup>. On top of  
757 the EFI output, for the ease of interpretation, two summary statistics were analysed in this  
758 study; they are the baseline (the coefficient  $C$  in Equation (1)) and the slope at  $x = 1$  mm (the  
759 coefficient product  $Ab$  in Equation (2)) of the EFI outputs. The sensitivity of each model  
760 descriptors on the EFI and its summary statistics were quantified using the Sobol first-order  
761 sensitivity indices ( $S_i$ ), which describe the contribution to the variance of the EFI or its  
762 summary statistics caused by one model descriptor only; the second-order indices ( $S_{ij}$ ),  
763 describing the contribution to the output variance due to the interaction of two model  
764 descriptors; and the total-order indices ( $S_T$ ), measuring the all order effect contribution to the  
765 output variance for each model descriptor. The analyses were performed using a Python open  
766 source package SALib<sup>59</sup>. Full results of the Sobol sensitivity analysis are available from the  
767 GitHub repository<sup>60</sup>.

768

769 **Statistical method**

770 Median absolute percentage error (MAPE) was chosen as the error measure in this study  
 771 because it presents the percentage change due to the error and avoids being too sensitive to  
 772 outliers. The MAPE between the predicted EFIs ( $EFI_{pred}$ ) and the experimental EFIs ( $EFI_{exp}$ ),  
 773 and the MAPE between the predicted geometric descriptors and the actual CT-measurements  
 774 were evaluated using Equation (5) and Equation (6) respectively, where  $a_{ij,exp}$  and  $a_{ij,pred}$   
 775 are the entries in  $EFI_{exp}$  and  $EFI_{pred}$ , and  $G_{CT}$  and  $\{G_1, G_2, \dots, G_{1000}\}$  are the CT-measured  
 776 geometric features and the 1,000 predicted geometric features. Similarity is defined by  
 777 Equation (7).

$$EFI_{exp} = \begin{bmatrix} a_{11,exp} & \cdots & a_{1j,exp} \\ \vdots & \ddots & \vdots \\ a_{i1,exp} & \cdots & a_{ij,exp} \end{bmatrix} \quad (5.1)$$

$$EFI_{pred} = \begin{bmatrix} a_{11,pred} & \cdots & a_{1j,pred} \\ \vdots & \ddots & \vdots \\ a_{i1,pred} & \cdots & a_{ij,pred} \end{bmatrix} \quad (5.2)$$

$$MAPE_{EFI} = \text{median of } \left\{ \frac{|a_{11,pred} - a_{11,exp}|}{a_{11,pred}}, \frac{|a_{12,pred} - a_{12,exp}|}{a_{12,pred}}, \dots, \frac{|a_{ij,pred} - a_{ij,exp}|}{a_{ij,pred}} \right\} \times 100\% \quad (5.3)$$

$$MAPE_{\text{geometric features}} = \text{median of } \left\{ \frac{G_1 - G_{CT}}{G_{CT}}, \frac{G_2 - G_{CT}}{G_{CT}}, \dots, \frac{G_{1000} - G_{CT}}{G_{CT}} \right\} \times 100\% \quad (6)$$

$$\text{Similarity (\%)} = 100 (\%) - MAPE (\%) \quad (7)$$

778

779 **Data availability**

780 The raw data of the 3PNN validation, Sobol sensitivity analysis, the stimulus spread trend,  
 781 the resistivity prediction and the uncertainty sensitivity analyses have been deposited in  
 782 Github (<https://github.com/chonlei/3PNN>) and in Zenodo under accession code  
 783 (<https://doi.org/10.5281/zenodo.5353394>)<sup>60</sup>. Other data generated in this study are provided  
 784 in the Source Data file. Restrictions apply to the availability of the clinical EFI and CT scan  
 785 data due to ethical restrictions as their containing information could compromise patient

786 confidentiality. These data will be made available upon reasonable request to the  
787 corresponding authors and in compliance with the ethical guideline used in the current study

788

789 **Code availability**

790 The code of the neural network model and the Sobol sensitivity analysis used in this study are  
791 available on Github (<https://github.com/chonlei/3PNN>) and through Zenodo  
792 (<https://doi.org/10.5281/zenodo.5353394>)<sup>60</sup>.

793

794 **References**

- 795 1. Schiavone, G. & Lacour, S. P. Conformable bioelectronic interfaces: Mapping the road  
796 ahead. *Sci. Transl. Med.* (2019).
- 797 2. Birmingham, K. *et al.* Bioelectronic medicines: A research roadmap. *Nature Reviews*  
798 *Drug Discovery* vol. 13 399–400 (2014).
- 799 3. Famm, K., Litt, B., Tracey, K. J., Boyden, E. S. & Slaoui, M. A jump-start for  
800 electroceuticals. *Nature* (2013).
- 801 4. McRackan, T. R. *et al.* Meta-analysis of quality-of-life improvement after cochlear  
802 implantation and associations with speech recognition abilities. *Laryngoscope* (2018).
- 803 5. Macherey, O. & Carlyon, R. P. Cochlear implants. *Current Biology* (2014).
- 804 6. Drennan, W. R., Svirsky, M. A., Fitzgerald, M. B. & Rubinstein, J. T. Mimicking  
805 Normal Auditory Functions with Cochlear Implant Sound Processing : Past, Present,  
806 and Future. in *Cochlear Implants* (eds. Waltzman, S. B. & Roland, J. T.) 47–60  
807 (Thieme Medical Publishers, Incorporated, 2014).
- 808 7. Vanpoucke, F. J., Zarowski, A. J. & Peeters, S. A. Identification of the impedance  
809 model of an implanted cochlear prosthesis from intracochlear potential measurements.  
810 *IEEE Trans. Biomed. Eng.* (2004).
- 811 8. Ben-Menachem, E. Vagus-nerve stimulation for the treatment of epilepsy. *Lancet*  
812 *Neurology* (2002).
- 813 9. Vöröslakos, M. *et al.* Direct effects of transcranial electric stimulation on brain circuits  
814 in rats and humans. *Nat. Commun.* (2018).

- 815 10. Frijns, J. H. M., de Snoo, S. L. & Schoonhoven, R. Potential distributions and neural  
816 excitation patterns in a rotationally symmetric model of the electrically stimulated  
817 cochlea. *Hear. Res.* (1995).
- 818 11. Shepherd, R. K., Hatsushika, S. & Clark, G. M. Electrical stimulation of the auditory  
819 nerve: The effect of electrode position on neural excitation. *Hear. Res.* (1993).
- 820 12. Nogueira, W., Schurzig, D., Büchner, D., Penninger, R. T. & Würfel, W. Validation of  
821 a cochlear implant patient-specific model of the voltage distribution in a clinical  
822 setting. *Front. Bioeng. Biotechnol.* (2016).
- 823 13. Erixon, E., Högstorp, H., Wadin, K. & Rask-Andersen, H. Variational anatomy of the  
824 human cochlea: Implications for cochlear implantation. *Otol. Neurotol.* (2009).
- 825 14. Maura K. Cosetti. Intraoperative Monitoring During Cochlear Implantation. in  
826 *Cochlear Implants* (eds. Susan B. Waltzman & J. Thomas Roland) 100–107 (Thieme  
827 Medical Publishers, Incorporated, 2014).
- 828 15. Wong, P. *et al.* Development and validation of a high-fidelity finite-element model of  
829 monopolar stimulation in the implanted Guinea pig cochlea. *IEEE Trans. Biomed.*  
830 *Eng.* (2016).
- 831 16. Adunka, O., Kiefer, J., Unkelbach, M. H., Lehnert, T. & Gstoettner, W. Development  
832 and evaluation of an improved cochlear implant electrode design for electric acoustic  
833 stimulation. *Laryngoscope* (2004).
- 834 17. Huang, C. Q., Shepherd, R. K., Carter, P. M., Seligman, P. M. & Tabor, B. Electrical  
835 stimulation of the auditory nerve: Direct current measurement in vivo. *IEEE Trans.*  
836 *Biomed. Eng.* (1999).
- 837 18. Ekdale, E. G. Form and function of the mammalian inner ear. *J. Anat.* (2016).
- 838 19. Opitz, A., Falchier, A., Linn, G. S., Milham, M. P. & Schroeder, C. E. Limitations of  
839 ex vivo measurements for in vivo neuroscience. *Proc. Natl. Acad. Sci. U. S. A.* (2017).
- 840 20. Romeni, S., Valle, G., Mazzoni, A. & Micera, S. Tutorial: a computational framework  
841 for the design and optimization of peripheral neural interfaces. *Nat. Protoc.* **15**, 3129–  
842 3153 (2020).

- 843 21. Malherbe, T. K., Hanekom, T. & Hanekom, J. J. The effect of the resistive properties  
844 of bone on neural excitation and electric fields in cochlear implant models. *Hear. Res.*  
845 (2015).
- 846 22. Tang, C. *et al.* Correlation between structure and resistivity variations of the live  
847 human skull. *IEEE Trans. Biomed. Eng.* (2008).
- 848 23. Akhtari, M. *et al.* Conductivities of three-layer live human skull. *Brain Topogr.*  
849 (2002).
- 850 24. Hoekema, R. *et al.* Measurement of the conductivity of skull, temporarily removed  
851 during epilepsy surgery. *Brain Topogr.* (2003).
- 852 25. Oostendorp, T. F., Delbeke, J. & Stegeman, D. F. The conductivity of the human skull:  
853 Results of in vivo and in vitro measurements. *IEEE Trans. Biomed. Eng.* (2000).
- 854 26. Fernandez-Corazza, M. *et al.* Skull modeling effects in conductivity estimates using  
855 parametric electrical impedance tomography. *IEEE Trans. Biomed. Eng.* (2018).
- 856 27. Balmer, T. W., Vesztegom, S., Broekmann, P., Stahel, A. & Büchler, P.  
857 Characterization of the electrical conductivity of bone and its correlation to osseous  
858 structure. *Sci. Rep.* (2018).
- 859 28. Kolesky, D. B. *et al.* 3D bioprinting of vascularized, heterogeneous cell-laden tissue  
860 constructs. *Adv. Mater.* (2014).
- 861 29. Armin Bunde & Jan W. Kantelhardt. Diffusion and Conduction in Percolation Systems  
862 – Theory and Applications. in *Diffusion in Condensed Matter* (eds. Heitjans, P. & Jörg  
863 Kärger) 895–914 (Springer, 2005).
- 864 30. Johnston, I. D., McCluskey, D. K., Tan, C. K. L. & Tracey, M. C. Mechanical  
865 characterization of bulk Sylgard 184 for microfluidics and microengineering. *J.*  
866 *Micromechanics Microengineering* (2014).
- 867 31. Faes, T. J. C., Van Der Meij, H. A., De Munck, J. C. & Heethaar, R. M. The electric  
868 resistivity of human tissues (100 HZ-10 MHZ): A meta- analysis of review studies.  
869 *Physiological Measurement* (1999).

- 870 32. Guimarães, C. F., Gasperini, L., Marques, A. P. & Reis, R. L. The stiffness of living  
871 tissues and its implications for tissue engineering. *Nature Reviews Materials* (2020).
- 872 33. Rho, J. Y., Tsui, T. Y. & Pharr, G. M. Elastic properties of human cortical and  
873 trabecular lamellar bone measured by nanoindentation. *Biomaterials* (1997).
- 874 34. Yang, C. & Suo, Z. Hydrogel ionotronics. *Nature Reviews Materials* (2018).
- 875 35. A J Pearmain & A G Clegg. Insulators. in *Electrical Engineer's Reference Book* (ed. G  
876 R Jones) 15 (Elsevier Ltd, 2013).
- 877 36. Pelliccia, P. *et al.* Cochlea size variability and implications in clinical practice. *Acta*  
878 *Otorhinolaryngol. Ital.* (2014).
- 879 37. Mori, M. C. & Chang, K. W. CT analysis demonstrates that cochlear height does not  
880 change with age. *Am. J. Neuroradiol.* (2012).
- 881 38. Davis, T. J. *et al.* Relationship between electrode-to-modiolus distance and current  
882 levels for adults with cochlear implants. *Otol. Neurotol.* (2016).
- 883 39. Horch, K. W. & Burgess, P. R. Peripheral Nervous System. in *Neuroprosthetics:*  
884 *Theory and Practice* (eds. Kenneth W. Horch & Gurpreet S. Dhillon) 30–45 (World  
885 Scientific Publishing Co.Pte. Ltd., 2004).
- 886 40. Rattay, F. The basic mechanism for the electrical stimulation of the nervous system.  
887 *Neuroscience* (1999).
- 888 41. Harada, Y. & Harada, Y. Reissner's membrane. in *Atlas of the Ear* 165–169 (Springer  
889 Netherlands, 1983).
- 890 42. Todd, C. A., Naghdy, F. & Svehla, M. J. Force application during cochlear implant  
891 insertion: An analysis for improvement of surgeon technique. *IEEE Trans. Biomed.*  
892 *Eng.* (2007).
- 893 43. Zeng, F. G., Rebscher, S., Harrison, W., Sun, X. & Feng, H. Cochlear Implants:  
894 System Design, Integration, and Evaluation. *IEEE Rev. Biomed. Eng.* (2008).
- 895 44. Pietsch, M. *et al.* Spiral Form of the Human Cochlea Results from Spatial Constraints.  
896 *Sci. Rep.* (2017).



- 897 45. Gill, E. L., Li, X., Birch, M. A. & Huang, Y. Y. S. Multi-length scale bioprinting  
898 towards simulating microenvironmental cues. *Bio-Design and Manufacturing* vol. 1  
899 77–88 (2018).
- 900 46. Jiang, C. *et al.* An Instrumented Cochlea Model for the Evaluation of Cochlear  
901 Implant Electrical Stimulus Spread. *IEEE Trans. Biomed. Eng.* **PP**, (2021).
- 902 47. Parreño, M., Di Lella, F. A., Fernandez, F., Boccio, C. M. & Ausili, S. A. Toward  
903 Self-Measures in Cochlear Implants: Daily and “Homemade” Impedance Assessment.  
904 *Front. Digit. Heal.* **2**, 582562 (2020).
- 905 48. Jiang, C., de Rijk, S. R., Malliaras, G. G. & Bance, M. L. Electrochemical impedance  
906 spectroscopy of human cochleas for modeling cochlear implant electrical stimulus  
907 spread. *APL Mater.* **8**, 1–8 (2020).
- 908 49. Fedorov, A. *et al.* 3D Slicer as an image computing platform for the Quantitative  
909 Imaging Network. *Magn. Reson. Imaging* (2012).
- 910 50. Hornik, K., Stinchcombe, M. & White, H. Multilayer feedforward networks are  
911 universal approximators. *Neural Networks* (1989).
- 912 51. Abadi, M. *et al.* TensorFlow: A system for large-scale machine learning. in  
913 *Proceedings of the 12th USENIX Symposium on Operating Systems Design and*  
914 *Implementation, OSDI 2016* (2016).
- 915 52. Kingma, D. P. & Ba, J. L. Adam: A method for stochastic optimization. in *3rd*  
916 *International Conference on Learning Representations, ICLR 2015 - Conference*  
917 *Track Proceedings* (2015).
- 918 53. Advanced Bionics®. *HiRes 90K® Surgeon’s Manual for the HiFocus® Helix and*  
919 *HiFocus® Ij Electrodes.* (2005).
- 920 54. Kohavi, R. A Study of Cross-Validation and Bootstrap for Accuracy Estimation and  
921 Model Selection. *Int. Jt. Conf. Artif. Intell.* (1995).
- 922 55. Toni, T., Welch, D., Strelkowa, N., Ipsen, A. & Stumpf, M. P. H. Approximate  
923 Bayesian computation scheme for parameter inference and model selection in  
924 dynamical systems. *J. R. Soc. Interface* (2009).

- 925 56. Clerx, M. *et al.* Probabilistic Inference on Noisy Time Series (PINTS). *J. Open Res.*  
926 *Softw.* **7**, 23 (2019).
- 927 57. Sobol, I. M. Global sensitivity indices for nonlinear mathematical models and their  
928 Monte Carlo estimates. *Math. Comput. Simul.* (2001).
- 929 58. Saltelli, A. Making best use of model evaluations to compute sensitivity indices.  
930 *Comput. Phys. Commun.* (2002).
- 931 59. Herman, J. & Usher, W. SALib: An open-source Python library for Sensitivity  
932 Analysis. *J. Open Source Softw.* (2017).
- 933 60. Lei, I. M. *et al.* 3D printed biomimetic cochleae and machine learning co-modelling  
934 provides clinical informatics for cochlear implant patients. *Zenodo*.  
935 <https://doi.org/10.5281/zenodo.5353394> (2021).

936

### 937 **Acknowledgements**

938 This work was supported by the European Research Council (ERC-StG, 758865), the  
939 Cambridge Hearing Trust and the Evelyn Trust. I.M.L. acknowledges the financial support  
940 from the W D Armstrong Trust and the Macao Postgraduate Scholarship Fund. C.J.  
941 acknowledges the support from the Wellcome Trust (204845/Z/16/Z). C.L.L. acknowledges  
942 the support from the University of Macau via a UM Macao Fellowship and the Clarendon  
943 Scholarship Fund. S.R.D.R. acknowledges the financial support from the Baroness de  
944 Turckheim Fund, Trinity College Cambridge. The authors acknowledge the Henry Royce  
945 Institute Cambridge Equipment (EP/P024947/1). We thank Advanced Bionics Corporation®  
946 for providing cochlear implants, software and anonymous EFI profiles on this research,  
947 Patrick Boyle for providing information on the EFI measurement setting, Anthony Dennis for  
948 technical assistance with  $\mu$ -CT imaging, Tomasz Matyz for his help with the anonymised  
949 patients' CT scans, and HaoTian Harvey Shi and Ruishan Liu for test running the code.

950

951

952 **Author contributions**

953 I.M.L., C.J., M.B. and Y.Y.S.H. conceived the project. I.M.L. performed majority of the  
954 experiments and data analysis including 3D printing, creation of biomimetic cochlear EFI  
955 library and COMSOL simulation. C.J. performed the EIS experiments. C.L.L. developed the  
956 neural network model, performed the Sobol sensitivity analysis and assisted with part of the  
957 data analysis. I.M.L. performed the neural network model optimisation and simulations. C.J.,  
958 S.R.D.R., Y.C.T., C.S. and M.B. assisted with the anonymised patient's data collection.  
959 Y.Y.S.H., G.G. and M.B. provided result interpretation. M.P.F.S. performed the mechanical  
960 deformation analysis. I.M.L. and Y.Y.S.H. wrote the initial manuscript. Y.Y.S.H and M.B.  
961 supervised the project. All authors discussed the results and revised the manuscript.

962

963 **Competing interests**

964 M.B. received research funding from Advanced Bionics<sup>®</sup>, Cochlear Corporation<sup>®</sup>, and in-  
965 kind contribution from MED-EL<sup>®</sup> on other research areas but not on the present study. The  
966 remaining authors declare no competing interests.
